# Supplementary material
Source: publisher figshare collection journal article supplement (https://acs.figshare.com/ndownloader/files/5724348)
Supplement: Supplementary file 1 [file 5724348]

**Time-resolved spectroscopic studies of B<sub>12</sub> coenzymes: A comparison of the primary photolysis mechanism in methyl-, ethyl-, n-propyl- and 5'-deoxyadenosylcobalamin.**

Allwyn G. Cole, Laurie M. Yoder, Joseph J. Shiang, Neil A. Anderson, Larry A. Walker II, Mark M. Banaszak Holl, and Roseanne J. Sension\*

Department of Chemistry, University of Michigan, Ann Arbor, MI 48109-1055

**Supporting Information**

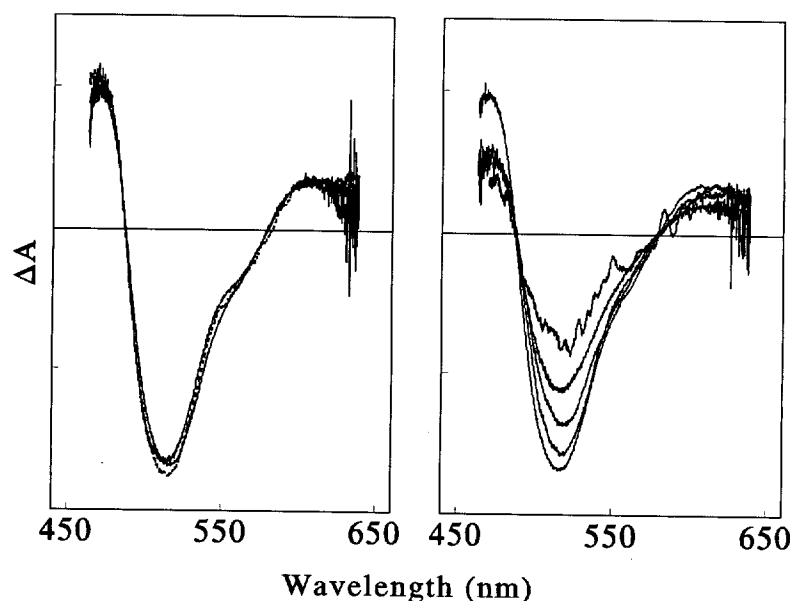

**Figure S1.** *Left hand panel:* Transient difference spectra obtained 15 ps (solid line), 50 ps (dashed lines) and 100 ps (solid line) after the photolysis of n-propylcobalamin at 400 nm. A modest evolution in the spectrum is observed around 550 nm over the first 50 ps. *Right hand panel:* Transient difference spectra obtained 100 ps, 200 ps, 400 ps, 800 ps and 5 ns following excitation of n-propylcobalamin at 400 nm. The spectral shape does not change on this time scale. The overall decay of the spectrum is attributed to geminate recombination of the initial radical pair.

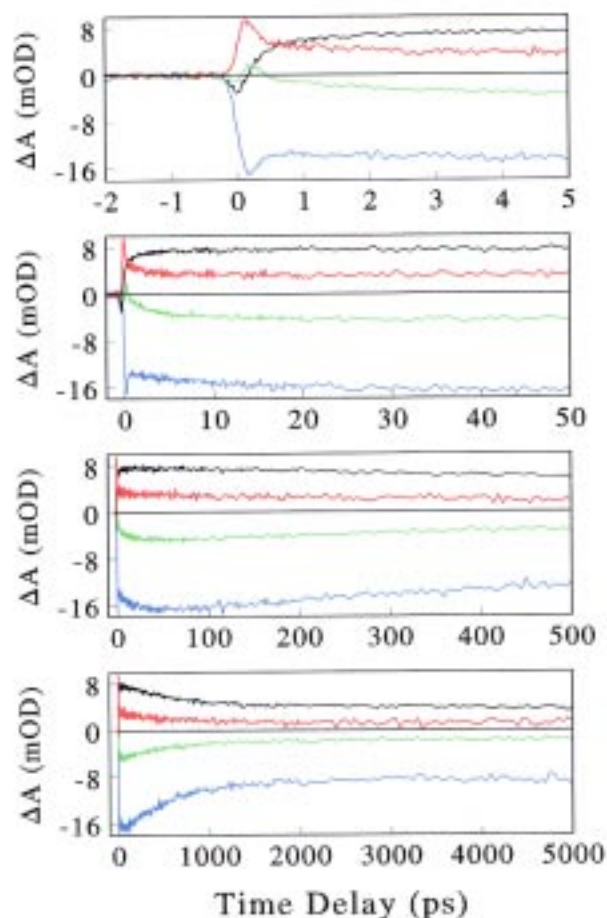

**Figure S2.** Transient kinetic measurements following excitation of n-propylcobalamin at 400 nm. Probe wavelengths are identified by color: 600 nm–red; 560 nm–green; 520 nm–blue; 470 nm–black.

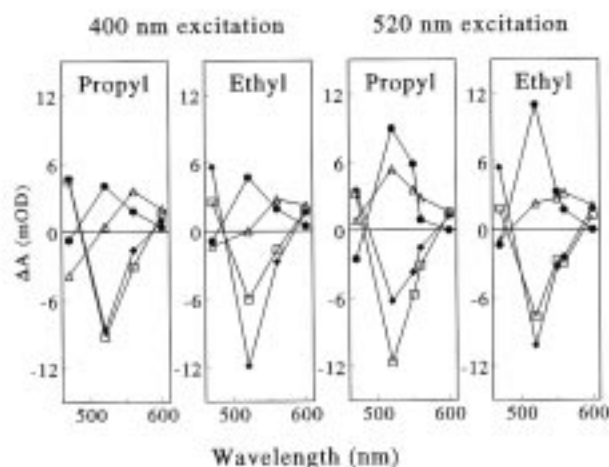

**Figure S3.** Decay associated difference spectra for ethyl- and n-propylcobalamin following excitation at 400 nm and 520 nm. The symbols represent:  $\triangle$ –  $k_2$ ,  $\bullet$ –  $k_3$ ,  $\square$ –  $k_4$ ,  $\blacklozenge$ –  $\infty$ .

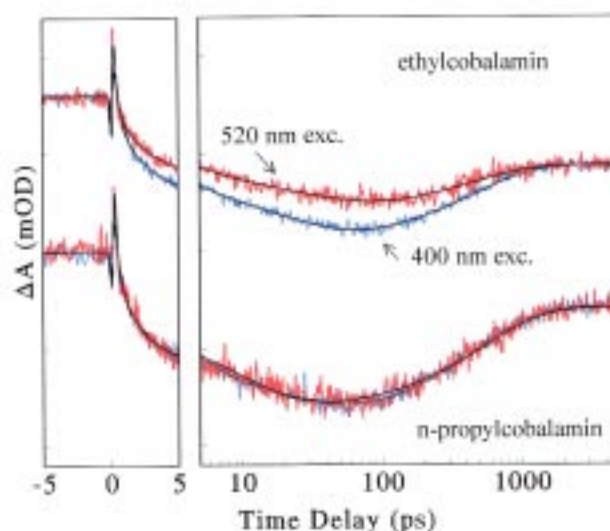

**Figure S4.** Comparison of transient kinetic measurements for ethylcobalamin and n-propylcobalamin following excitation at 400 nm and 520 nm, probed at 560 nm on the red edge of the bleach.

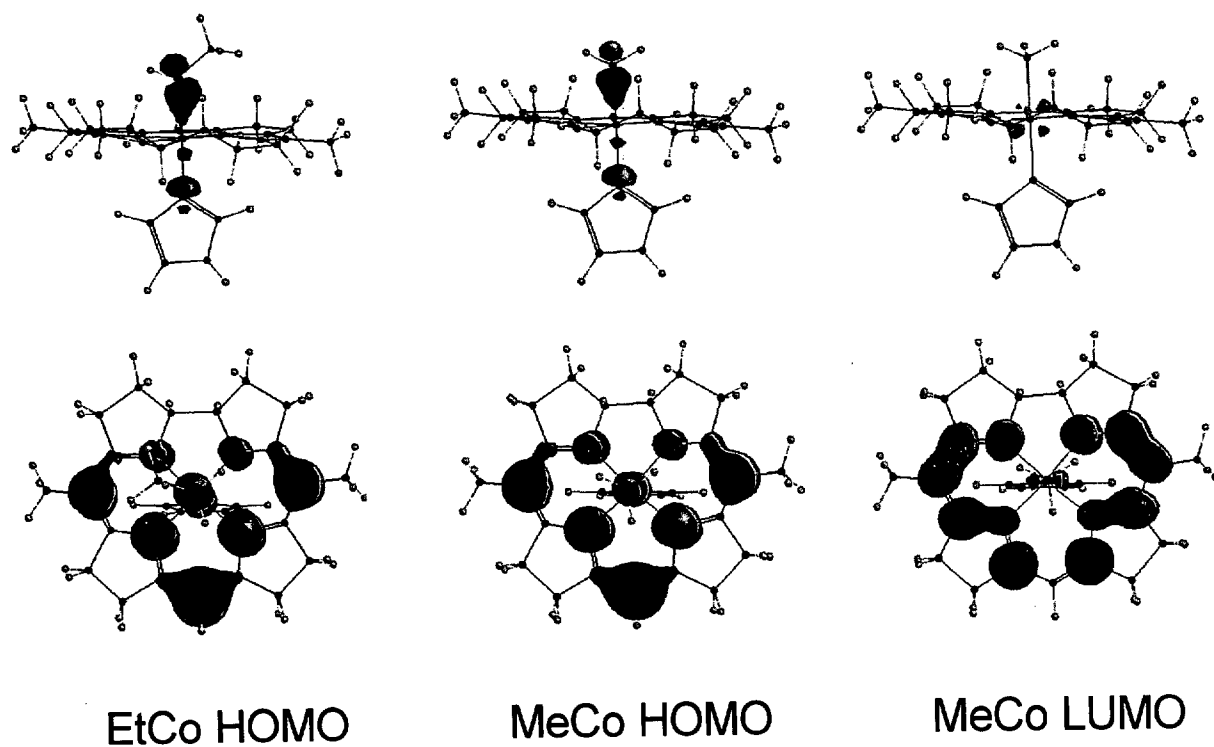

**Figure S5.** Two views of the HOMOs for ethyl- and methylcobalamin, and the LUMO for methylcobalamin. The top view is perpendicular to the imidazole-cobalt axis. In this view the corrin ring  $\pi$  orbitals have been removed to provide a better view of the axial orbitals. The lower view is along the imidazole-cobalt axis. In this view the corrin ring  $\pi$  orbitals have been retained.
